# Supplementary material for: Genome-Wide Co-Expression Distributions as a Metric to Prioritize Genes of Functional Importance
Source: MDPI journal article supplement (doi:10.3390/genes11101231), 2020-10-20
Supplement: s1 [file s1]

# Genome-wide co-expression distributions as a metric to prioritize genes of functional importance

## Additional File 1

**Table S1. Expected bin proportions, mean, standard deviation (SD), skewness and kurtosis for the 8 shapes.**

|         | Expected 0.25-Bin Proportions, % |       |       |       |       |       |       |       | Mean   | SD    | Skewness | Kurtosis |
|---------|----------------------------------|-------|-------|-------|-------|-------|-------|-------|--------|-------|----------|----------|
|         | Bin 1                            | Bin 2 | Bin 3 | Bin 4 | Bin 5 | Bin 6 | Bin 7 | Bin 8 |        |       |          |          |
| Shape 1 | 5                                | 10    | 15    | 20    | 20    | 15    | 10    | 5     | 0      | 0.456 | 0        | -0.660   |
| Shape 2 | 2                                | 5     | 15    | 28    | 28    | 15    | 5     | 2     | 0      | 0.354 | 0        | 0.065    |
| Shape 3 | 15                               | 30    | 25    | 15    | 9     | 3     | 2     | 1     | -0.387 | 0.382 | 0.857    | 0.640    |
| Shape 4 | 1                                | 2     | 3     | 9     | 15    | 25    | 30    | 15    | 0.387  | 0.382 | -0.857   | 0.640    |
| Shape 5 | 28                               | 15    | 5     | 2     | 2     | 5     | 15    | 28    | 0      | 0.752 | 0        | -1.771   |
| Shape 6 | 5                                | 25    | 15    | 5     | 5     | 15    | 25    | 5     | 0      | 0.566 | 0        | -1.535   |
| Shape 7 | 5                                | 30    | 20    | 10    | 5     | 10    | 15    | 5     | -0.137 | 0.532 | 0.5      | -1.111   |
| Shape 8 | 5                                | 15    | 10    | 5     | 10    | 20    | 30    | 5     | 0.137  | 0.532 | -0.5     | -1.111   |

**Table S2. Datasets summary.**

| Dataset                  | Number of tissues  | Number of libraries       | Number of genes | Gene filtering criteria                                                       | Reference                                                                                    |
|--------------------------|--------------------|---------------------------|-----------------|-------------------------------------------------------------------------------|----------------------------------------------------------------------------------------------|
| Cattle feed efficiency   | 5                  | 86                        | 11,662          | Average log2FPKM > 1 across all tissues                                       | Alexandre et al. (2015)                                                                      |
| Cattle puberty           | 5                  | 60                        | 16,978          | Average FPKM $\geq$ 0.2 in at least 1 tissue                                  | Fortes et al. (2016)<br>Nguyen et al. (2017)<br>Fortes et al. (2018)<br>Nguyen et al. (2018) |
| Drosophila embryogenesis | 1 (14 time-points) | 68 averaged by time point | 7,771           | More than 0 counts in at least 20 samples and more than 100 counts on average | Becker et al. (2018)                                                                         |
| Duck preadipocyte        | 1 (6 time-points)  | 36 averaged by time point | 13,322          | FPKM > 0 in all samples                                                       | Wang et al. (2019)                                                                           |
| Human                    | 1                  | 15                        | 19,206          | TPM > 0 in all samples                                                        | Lonsdale et al. (2013)                                                                       |

FPKM - fragments per kilobase of gene per million mapped reads

TPM – transcripts per million reads

**Table S3. Number of genes assigned to each distribution shape in datasets with contrasting phenotypes.** Numbers in parentheses represent the P-values for enrichment (above) and depletion (below). The categories include differentially expressed (DE) and regulator (REG) genes.

|                | Cattle Feed Efficiency Dataset |                          |                        |                           |        | Cattle Puberty Dataset   |                            |                         |                            |        |
|----------------|--------------------------------|--------------------------|------------------------|---------------------------|--------|--------------------------|----------------------------|-------------------------|----------------------------|--------|
|                | REG                            | DE                       | DE-REG                 | Others                    | Total  | REG                      | DE                         | DE-REG                  | Others                     | Total  |
| <b>Shape 1</b> | (1)<br>122<br>(1.62E-07)       | (2.93E-05)<br>91<br>(1)  | (0.31)<br>6<br>(0.83)  | (0.03)<br>1,784<br>(0.98) | 2,003  | (1)<br>449<br>(4.87E-13) | (8.70E-59)<br>1,223<br>(1) | (5.14E-06)<br>82<br>(1) | (1)<br>5,003<br>(4.19E-21) | 6,757  |
| <b>Shape 2</b> | (1)<br>48<br>(3.61E-04)        | (9.20E-09)<br>56<br>(1)  | (0.12)<br>4<br>(0.96)  | (0.80)<br>717<br>(0.23)   | 825    | (1)<br>31<br>(4.39E-03)  | (2.11E-20)<br>153<br>(1)   | (0.49)<br>5<br>(0.68)   | (1)<br>372<br>(1.82E-10)   | 561    |
| <b>Shape 3</b> | (1)<br>31<br>(2.10E-08)        | (0.08)<br>40<br>(0.95)   | (0.85)<br>1<br>(0.45)  | (3.73E-03)<br>708<br>(1)  | 780    | (1)<br>0<br>(0.84)       | (1)<br>0<br>(0.76)         | (1)<br>0<br>(0.98)      | (0.60)<br>2<br>(1)         | 2      |
| <b>Shape 4</b> | (5.94E-17)<br>818<br>(1)       | (1)<br>157<br>(1.94E-19) | (0.86)<br>16<br>(0.25) | (0.98)<br>6,835<br>(0.02) | 7,826  | (0.16)<br>1<br>(0.99)    | (1)<br>0<br>(0.76)         | (1)<br>0<br>(0.98)      | (0.95)<br>1<br>(0.40)      | 2      |
| <b>Shape 5</b> | (1)<br>0<br>(1)                | (1)<br>0<br>(1)          | (1)<br>0<br>(1)        | (1)<br>0<br>(1)           | 0      | (1)<br>0<br>(1)          | (1)<br>0<br>(1)            | (1)<br>0<br>(1)         | (1)<br>0<br>(1)            | 0      |
| <b>Shape 6</b> | (1)<br>0<br>(1)                | (1)<br>0<br>(1)          | (1)<br>0<br>(1)        | (1)<br>0<br>(1)           | 0      | (1)<br>0<br>(1)          | (1)<br>0<br>(1)            | (1)<br>0<br>(1)         | (1)<br>0<br>(1)            | 0      |
| <b>Shape 7</b> | (0.74)<br>7<br>(0.40)          | (7.63E-111)<br>6<br>(1)  | (1)<br>0<br>(1)        | (0.76)<br>80<br>(0.35)    | 93     | (1)<br>182<br>(4.22E-11) | (3.11E-36)<br>636<br>(1)   | (1.52E-06)<br>50<br>(1) | (1)<br>2,315<br>(7.78E-14) | 3,183  |
| <b>Shape 8</b> | (0.03)<br>19<br>(0.98)         | (2.47E-08)<br>5<br>(1)   | (1)<br>0<br>(1)        | (0.98)<br>111<br>(0.04)   | 135    | (5.86E-38)<br>781<br>(1) | (1)<br>183<br>(4.99E-251)  | (1)<br>3<br>(5.12E-25)  | (1.43E-75)<br>5,506<br>(1) | 6,473  |
| <b>Total</b>   | 1,045                          | 355                      | 27                     | 10,235                    | 11,662 | 346                      | 236                        | 9                       | 1,952                      | 16,978 |

**Table S4. Number of genes assigned to each distribution shape in the cattle feed efficiency dataset split by phenotype.** Numbers in parentheses represent the P-values for enrichment (above) and depletion (below). The categories include differentially expressed (DE) and regulator (REG) genes.

|                | Low Feed Efficiency |            |        |            |        | High Feed Efficiency |            |        |          |        |
|----------------|---------------------|------------|--------|------------|--------|----------------------|------------|--------|----------|--------|
|                | REG                 | DE         | DE-REG | Others     | Total  | REG                  | DE         | DE-REG | Others   | Total  |
| <b>Shape 1</b> | (1)                 | (7.67E-07) | (0.05) | (0.12)     | 2,137  | (1)                  | (3.18E-05) | (0.58) | (0.01)   | 1,729  |
|                | 134                 | 102        | 9      | 1,892      |        | 98                   | 81         | 4      | 1,546    |        |
|                | (3.49E-07)          | (1)        | (0.98) | (0.89)     |        | (2.97E-08)           | (1)        | (0.63) | (0.99)   |        |
| <b>Shape 2</b> | (1)                 | (1.39E-10) | (0.56) | (0.96)     | 800    | (0.97)               | (7.37E-08) | (0.04) | (0.97)   | 830    |
|                | 52                  | 59         | 2      | 687        |        | 60                   | 54         | 5      | 711      |        |
|                | (0.01)              | (1)        | (0.72) | (0.05)     |        | (0.04)               | (1)        | (0.99) | (0.03)   |        |
| <b>Shape 3</b> | (1)                 | (0.04)     | (0.83) | (1.96E-04) | 732    | 1                    | 0.01       | 0.85   | 5.89E-04 | 786    |
|                | 28                  | 31         | 1      | 672        |        | 32                   | 35         | 1      | 718      |        |
|                | (2.14E-08)          | (0.98)     | (0.49) | (1)        |        | (3.66E-08)           | (0.99)     | (0.45) | (1)      |        |
| <b>Shape 4</b> | (3.75E-18)          | (1)        | (0.80) | (0.97)     | 7,192  | (3.66E-16)           | (1)        | (0.87) | (0.99)   | 8,267  |
|                | 771                 | 127        | 15     | 6,279      |        | 850                  | 179        | 17     | 7,221    |        |
|                | (1)                 | (1.16E-23) | (0.32) | (0.03)     |        | (1)                  | (1.42E-16) | (0.24) | (0.02)   |        |
| <b>Shape 5</b> | (1)                 | (1)        | (1)    | (1)        | 0      | (1)                  | (1)        | (1)    | (1)      | 0      |
|                | 0                   | 0          | 0      | 0          |        | 0                    | 0          | 0      | 0        |        |
|                | (1)                 | (1)        | (1)    | (1)        |        | (1)                  | (1)        | (1)    | (1)      |        |
| <b>Shape 6</b> | (1)                 | (1)        | (1)    | (1)        | 0      | (1)                  | (1)        | (1)    | (1)      | 0      |
|                | 0                   | 0          | 0      | 0          |        | 0                    | 0          | 0      | 0        |        |
|                | (1)                 | (1)        | (1)    | (1)        |        | (1)                  | (1)        | (1)    | (1)      |        |
| <b>Shape 7</b> | (1)                 | (2.08E-04) | (1)    | (0.52)     | 248    | (1)                  | (4.21E-04) | (1)    | (0.90)   | 33     |
|                | 11                  | 19         | 0      | 218        |        | 0                    | 6          | 0      | 27       |        |
|                | (4.71E-03)          | (1)        | (0.56) | (0.56)     |        | (0.04)               | (1)        | (0.93) | (0.21)   |        |
| <b>Shape 8</b> | (0.56)              | (0.52)     | (1)    | (0.44)     | 553    | (0.01)               | (1)        | (1)    | (0.99)   | 17     |
|                | 49                  | 17         | 0      | 487        |        | 5                    | 0          | 0      | 12       |        |
|                | (0.50)              | (0.58)     | (0.27) | (0.61)     |        | (1)                  | (0.59)     | (0.96) | (0.05)   |        |
| <b>Total</b>   | 1,045               | 355        | 27     | 10,235     | 11,662 | 1,045                | 355        | 27     | 10,235   | 11,662 |

**Table S5. Number of genes assigned to each distribution shape in the cattle puberty dataset split by phenotype.** Numbers in parentheses represent the P-values for enrichment (above) and depletion (below). The categories include differentially expressed (DE) and regulator (REG) genes.

|                | Pre-puberty              |                            |                         |                            |        | Post-puberty             |                            |                         |                            |        |
|----------------|--------------------------|----------------------------|-------------------------|----------------------------|--------|--------------------------|----------------------------|-------------------------|----------------------------|--------|
|                | REG                      | DE                         | DE-REG                  | Others                     | Total  | REG                      | DE                         | DE-REG                  | Others                     | Total  |
| <b>Shape 1</b> | (1)<br>397<br>(1.61E-15) | (6.66E-66)<br>1,179<br>(1) | (2.05E-05)<br>76<br>(1) | (1)<br>4,620<br>(1.61E-22) | 6,272  | (1)<br>478<br>(1.32E-09) | (4.66E-64)<br>1,254<br>(1) | (6.50E-08)<br>88<br>(1) | (1)<br>5,046<br>(6.50E-28) | 6,866  |
| <b>Shape 2</b> | (1)<br>31<br>(5.45E-04)  | (9.98E-23)<br>169<br>(1)   | (0.75)<br>4<br>(0.42)   | (1)<br>412<br>(1.86E-10)   | 616    | (1)<br>23<br>(2.81E-03)  | (4.12E-14)<br>118<br>(1)   | (0.89)<br>2<br>(0.27)   | (1)<br>314<br>(3.77E-06)   | 457    |
| <b>Shape 3</b> | (1)<br>0<br>(0.64)       | (0.13)<br>2<br>(0.98)      | (1)<br>0<br>(0.96)      | (0.92)<br>3<br>(0.31)      | 5      | (1)<br>0<br>(0.54)       | (0.01)<br>4<br>(1)         | (1)<br>0<br>(0.94)      | (0.99)<br>3<br>(0.05)      | 7      |
| <b>Shape 4</b> | (1)<br>0<br>(0.84)       | (0.02)<br>2<br>(1)         | (1)<br>0<br>(0.98)      | (1)<br>0<br>(0.05)         | 2      | (1)<br>0<br>(0.92)       | (0.13)<br>1<br>(1)         | (1)<br>0<br>(0.99)      | (1)<br>0<br>(0.22)         | 1      |
| <b>Shape 5</b> | (1)<br>0<br>(1)          | (1)<br>0<br>(1)            | (1)<br>0<br>(1)         | (1)<br>0<br>(1)            | 0      | (1)<br>0<br>(1)          | (1)<br>0<br>(1)            | (1)<br>0<br>(1)         | (1)<br>0<br>(1)            | 0      |
| <b>Shape 6</b> | (1)<br>0<br>(1)          | (1)<br>0<br>(1)            | (1)<br>0<br>(1)         | (1)<br>0<br>(1)            | 0      | (1)<br>0<br>(1)          | (1)<br>0<br>(1)            | (1)<br>0<br>(1)         | (1)<br>0<br>(1)            | 0      |
| <b>Shape 7</b> | (1)<br>196<br>(1.70E-09) | (3.96E-35)<br>646<br>(1)   | (3.58E-09)<br>57<br>(1) | (1)<br>2,373<br>(2.75E-15) | 3,272  | (1)<br>167<br>(2.62E-14) | (3.76E-33)<br>622<br>(1)   | (7.22E-06)<br>48<br>(1) | (1)<br>2,323<br>(2.57E-10) | 3,160  |
| <b>Shape 8</b> | (1.17E-40)<br>819<br>(1) | (1)<br>198<br>(5.71E-265)  | (1)<br>3<br>(6.54E-27)  | (7.56E-81)<br>5,791<br>(1) | 6,811  | (7.00E-36)<br>775<br>(1) | (1)<br>197<br>(7.66E-240)  | (1)<br>2<br>(1.47E-26)  | (2.93E-74)<br>5,513<br>(1) | 6,487  |
| <b>Total</b>   | 1,443                    | 2,196                      | 140                     | 13,199                     | 16,978 | 1,443                    | 2,196                      | 140                     | 13,199                     | 16,978 |

**Table S6. Number of genes assigned to each distribution shape in time-series datasets.** Numbers in parentheses represent the P-values for enrichment (above) and depletion (below). The categories include differentially expressed (DE) and regulator (REG) genes – refer to methods for specific categories in Drosophila dataset.

|                | Drosophila Embryogenesis Dataset |            |            |            |            |            |       | Duck Preadipocyte Dataset |            |            |            |        |
|----------------|----------------------------------|------------|------------|------------|------------|------------|-------|---------------------------|------------|------------|------------|--------|
|                | Down/down                        | Down/up    | Up/down    | Up/up      | REG        | Others     | Total | REG                       | DE         | DE-REG     | Others     | Total  |
| <b>Shape 1</b> | (4.29E-16)                       | (0.94)     | (0.01)     | (8.74E-04) | (1)        | (1)        | 1,433 | (0.97)                    | (1.17E-10) | (0.15)     | (1)        | 1,983  |
|                | 292                              | 305        | 76         | 122        | 106        | 638        |       | 63                        | 584        | 29         | 1,307      |        |
|                | (1)                              | (0.07)     | (0.99)     | (1)        | (4.17E-05) | (8.45E-13) |       | (0.05)                    | (1)        | (0.90)     | (1.47E-08) |        |
| <b>Shape 2</b> | (0.16)                           | (0.96)     | (0.02)     | (0.63)     | (0.98)     | (0.69)     | 98    | (0.43)                    | (1)        | (0.83)     | (6.66E-10) | 262    |
|                | 17                               | 16         | 9          | 6          | 5          | 50         |       | 11                        | 21         | 2          | 228        |        |
|                | (0.90)                           | (0.08)     | (0.99)     | (0.53)     | (0.06)     | (0.39)     |       | (0.69)                    | (1.71E-11) | (0.39)     | (1)        |        |
| <b>Shape 3</b> | (0.14)                           | (0.41)     | (1)        | (1)        | (1)        | (0.87)     | 10    | 1                         | 1          | 1          | (0.26)     | 4      |
|                | 3                                | 3          | 0          | 0          | 0          | 4          |       | 0                         | 0          | 0          | 4          |        |
|                | (0.96)                           | (0.83)     | (0.65)     | (0.51)     | (0.34)     | (0.31)     |       | (0.85)                    | (0.34)     | (0.95)     | 1          |        |
| <b>Shape 4</b> | (1)                              | (1)        | (1)        | (1)        | (1)        | (1)        | 0     | (1)                       | (1)        | (1)        | (1)        | 0      |
|                | 0                                | 0          | 0          | 0          | 0          | 0          |       | 0                         | 0          | 0          | 0          |        |
|                | (1)                              | (1)        | (1)        | (1)        | (1)        | (1)        |       | (1)                       | (1)        | (1)        | (1)        |        |
| <b>Shape 5</b> | (1)                              | (1)        | (1)        | (1)        | (1)        | (1)        | 0     | (1)                       | (1)        | (1)        | (1)        | 0      |
|                | 0                                | 0          | 0          | 0          | 0          | 0          |       | 0                         | 0          | 0          | 0          |        |
|                | (1)                              | (1)        | (1)        | (1)        | (1)        | (1)        |       | (1)                       | (1)        | (1)        | (1)        |        |
| <b>Shape 6</b> | (1)                              | (1.38E-18) | (0.02)     | (1)        | (0.07)     | (0.12)     | 4,390 | (0.58)                    | (0.83)     | (0.06)     | (0.32)     | 1,425  |
|                | 468                              | 1,159      | 202        | 210        | 467        | 2,351      |       | 54                        | 324        | 24         | 1,023      |        |
|                | (8.76E-17)                       | (1)        | (0.98)     | (3.46E-13) | (0.94)     | (0.89)     |       | (0.47)                    | (0.18)     | (0.97)     | (0.71)     |        |
| <b>Shape 7</b> | (1)                              | (1)        | (0.20)     | (4.75E-51) | (2.62E-05) | (6.07E-29) | 790   | (0.90)                    | (5.42E-11) | (9.71E-04) | (1)        | 3,332  |
|                | 1                                | 16         | 38         | 171        | 115        | 564        |       | 117                       | 930        | 58         | 2,227      |        |
|                | (3.27E-51)                       | (1.6E-69)  | (0.84)     | (1)        | (1)        | (1)        |       | (0.12)                    | (1)        | (1)        | (1.06E-10) |        |
| <b>Shape 8</b> | (1.43E-29)                       | (0.01)     | (1)        | (1)        | (0.85)     | (1)        | 1,050 | (0.01)                    | (1)        | (1)        | (1.05E-14) | 6,316  |
|                | 267                              | 271        | 1          | 2          | 98         | 509        |       | 270                       | 1,302      | 47         | 4,697      |        |
|                | (1)                              | (0.99)     | (5.10E-20) | (1.48E-30) | (0.18)     | (9.72E-04) |       | (0.99)                    | (5.3E-16)  | (2.2E-06)  | (1)        |        |
| <b>Total</b>   | 1,048                            | 1,770      | 326        | 511        | 791        | 4,116      | 7,771 | 515                       | 3,161      | 160        | 9,486      | 13,322 |

**Table S7. Number of genes assigned to each distribution shape in the human dataset.** Numbers in parentheses represent the P-values for enrichment (above) and depletion (below). The categories include differentially expressed (DE), regulator (REG) and tissue enriched (TE) genes.

|                | Human Dataset            |                          |                         |                         |                               |        |
|----------------|--------------------------|--------------------------|-------------------------|-------------------------|-------------------------------|--------|
|                | REG                      | DE                       | DE-REG                  | TE                      | Others                        | Total  |
| <b>Shape 1</b> | (0.55)<br>215<br>(0.48)  | (2.48E-04)<br>182<br>(1) | (0.02)<br>24<br>(0.99)  | (0.09)<br>55<br>(0.93)  | (1)<br>3,411<br>(1.53E-03)    | 3,881  |
| <b>Shape 2</b> | (9.31E-06)<br>344<br>(1) | (3.28E-10)<br>262<br>(1) | (2.92E-04)<br>35<br>(1) | (0.99)<br>46<br>(0.01)  | (1)<br>4,382<br>(6.34E-13)    | 5,065  |
| <b>Shape 3</b> | (0.92)<br>1<br>(0.30)    | (4.82E-03)<br>6<br>(1)   | (0.16)<br>1<br>(0.99)   | (1)<br>0<br>(0.60)      | (0.96)<br>35<br>(0.09)        | 43     |
| <b>Shape 4</b> | (0.37)<br>1<br>(0.93)    | (1)<br>0<br>(0.74)       | (1)<br>0<br>(0.97)      | (1)<br>0<br>(0.91)      | (0.79)<br>7<br>(0.60)         | 8      |
| <b>Shape 5</b> | (1)<br>0<br>(1)          | (1)<br>0<br>(1)          | (1)<br>0<br>(1)         | (1)<br>0<br>(1)         | (1)<br>0<br>(1)               | 0      |
| <b>Shape 6</b> | (1)<br>0<br>(1)          | (1)<br>0<br>(1)          | (1)<br>0<br>(1)         | (1)<br>0<br>(1)         | (1)<br>0<br>(1)               | 0      |
| <b>Shape 7</b> | (1)<br>79<br>(4.00E-03)  | (1)<br>48<br>(2.94E-03)  | (0.88)<br>5<br>(0.22)   | (7.21E-34)<br>91<br>(1) | (9.40E-01)<br>1,640<br>(0.07) | 1,860  |
| <b>Shape 8</b> | (0.99)<br>435<br>(0.01)  | (1)<br>217<br>(5.79E-14) | (1)<br>13<br>(3.59E-07) | (1)<br>39<br>(2.65E-18) | (3.58E-24)<br>7,733<br>(1)    | 8,427  |
| <b>Total</b>   | 1,075                    | 715                      | 78                      | 231                     | 17,208                        | 19,284 |

**Table S8. Average number of connections per gene (Log10) falling in each shape according to the dataset and P-value for the one-way ANOVA.**

| Dataset                         | Average number of connections per gene (Log10) |         |         |         |         |         |         |         | P-value |
|---------------------------------|------------------------------------------------|---------|---------|---------|---------|---------|---------|---------|---------|
|                                 | Shape 1                                        | Shape 2 | Shape 3 | Shape 4 | Shape 5 | Shape 6 | Shape 7 | Shape 8 |         |
| <b>Cattle feed efficiency</b>   | 3.04                                           | 2.81    | 3.30    | 3.49    | -       | -       | 3.15    | 3.20    | <2E-16  |
| <b>Cattle puberty</b>           | 3.14                                           | 2.52    | 1.40    | 1.87    | -       | -       | 3.57    | 3.58    | <2E-16  |
| <b>Drosophila embryogenesis</b> | 2.58                                           | 2.26    | 2.39    | -       | -       | 3.03    | 2.92    | 2.87    | <2E-16  |
| <b>Duck preadipocyte</b>        | 2.33                                           | 2.06    | 1.82    | -       | -       | 2.60    | 2.60    | 2.66    | <2E-16  |
| <b>Human</b>                    | 2.60                                           | 2.34    | 2.46    | 2.40    | -       | -       | 3.17    | 3.44    | <2E-16  |

**Table S9. Number of genes assigned to each distribution shape in all datasets based on genes being on the top or bottom 5% when ranked by degree (number of significant correlations to other genes). Numbers in parentheses represent the P-values for enrichment (above) and depletion (below).**

|                | <b>Feed Efficiency</b>   |                           | <b>Puberty</b>           |                           | <b>Drosophila</b>         |                          | <b>Duck</b>              |                          | <b>Human</b>            |                         |
|----------------|--------------------------|---------------------------|--------------------------|---------------------------|---------------------------|--------------------------|--------------------------|--------------------------|-------------------------|-------------------------|
|                | <b>Top</b>               | <b>Bottom</b>             | <b>Top</b>               | <b>Bottom</b>             | <b>Top</b>                | <b>Bottom</b>            | <b>Top</b>               | <b>Bottom</b>            | <b>Top</b>              | <b>Bottom</b>           |
| <b>Shape 1</b> | (1)<br>0<br>(8.44E-50)   | (4.72E-24)<br>198<br>(1)  | (1)<br>0<br>(3.27E-194)  | (1.56E-37)<br>518<br>(1)  | (1)<br>0<br>(3.74E-36)    | (7.1E-126)<br>280<br>(1) | (1)<br>0<br>(1.18E-48)   | (9.3E-110)<br>335<br>(1) | (1)<br>0<br>(9.50E-98)  | (1)<br>61<br>(3.78E-35) |
| <b>Shape 2</b> | (1)<br>0<br>(8.41E-20)   | (4.27E-252)<br>335<br>(1) | (1)<br>0<br>(1.93E-13)   | (8.64E-275)<br>314<br>(1) | (1)<br>0<br>(6.31E-03)    | (8.84E-44)<br>53<br>(1)  | (1)<br>0<br>(1.27E-06)   | (2.3E-280)<br>231<br>(1) | (1)<br>0<br>(1.90E-132) | (<1E-999)<br>894<br>(1) |
| <b>Shape 3</b> | (1)<br>5<br>(1.54E-12)   | (1)<br>18<br>(6.76E-05)   | (1)<br>0<br>(0.90)       | (2.50E-03)<br>2<br>(1)    | (1)<br>0<br>(5.98E-01)    | (2.68E-06)<br>6<br>(1)   | (1)<br>0<br>(0.81)       | (6.19E-06)<br>4<br>(1)   | (1)<br>0<br>(0.11)      | (4.02E-05)<br>10<br>(1) |
| <b>Shape 4</b> | (1.38E-94)<br>578<br>(1) | (1)<br>31<br>(6.97E-233)  | (1)<br>0<br>(0.90)       | (2.50E-03)<br>2<br>(1)    | (1)<br>0<br>(1)           | (1)<br>0<br>(1)          | (1)<br>0<br>(1)          | (1)<br>0<br>(1)          | (1)<br>0<br>(0.66)      | (0.34)<br>1<br>(0.94)   |
| <b>Shape 5</b> | (1)<br>0<br>(1)          | (1)<br>0<br>(1)           | (1)<br>0<br>(1)          | (1)<br>0<br>(1)           | (1)<br>0<br>(1)           | (1)<br>0<br>(1)          | (1)<br>0<br>(1)          | (1)<br>0<br>(1)          | (1)<br>0<br>(1)         | (1)<br>0<br>(1)         |
| <b>Shape 6</b> | (1)<br>0<br>(1)          | (1)<br>0<br>(1)           | (1)<br>0<br>(1)          | (1)<br>0<br>(1)           | (1.31E-100)<br>389<br>(1) | (1)<br>27<br>(3.3E-101)  | (1)<br>0<br>(2.41E-34)   | (1)<br>1<br>(2.06E-32)   | (1)<br>0<br>(1)         | (1)<br>0<br>(1)         |
| <b>Shape 7</b> | (1)<br>0<br>(8.32E-03)   | (0.99)<br>1<br>(0.05)     | (1.54E-31)<br>299<br>(1) | (1)<br>5<br>(5.83E-70)    | (1)<br>0<br>(2.48E-19)    | (1)<br>13<br>(1.99E-07)  | (0.99)<br>142<br>(0.01)  | (1)<br>45<br>(2.35E-36)  | (1)<br>1<br>(2.13E-42)  | (1)<br>0<br>(1.94E-44)  |
| <b>Shape 8</b> | (1)<br>0<br>(9.45E-04)   | (1)<br>0<br>(9.45E-04)    | (1.77E-58)<br>550<br>(1) | (1)<br>8<br>(3.03E-166)   | (1)<br>0<br>(6.20E-26)    | (1)<br>10<br>(2.14E-14)  | (1.31E-64)<br>524<br>(1) | (1)<br>50<br>(8.6E-118)  | (<1E-999)<br>965<br>(1) | (1)<br>0<br>(2.81E-250) |
| <b>Total</b>   | 583                      | 583                       | 849                      | 849                       | 389                       | 389                      | 666                      | 666                      | 966                     | 966                     |

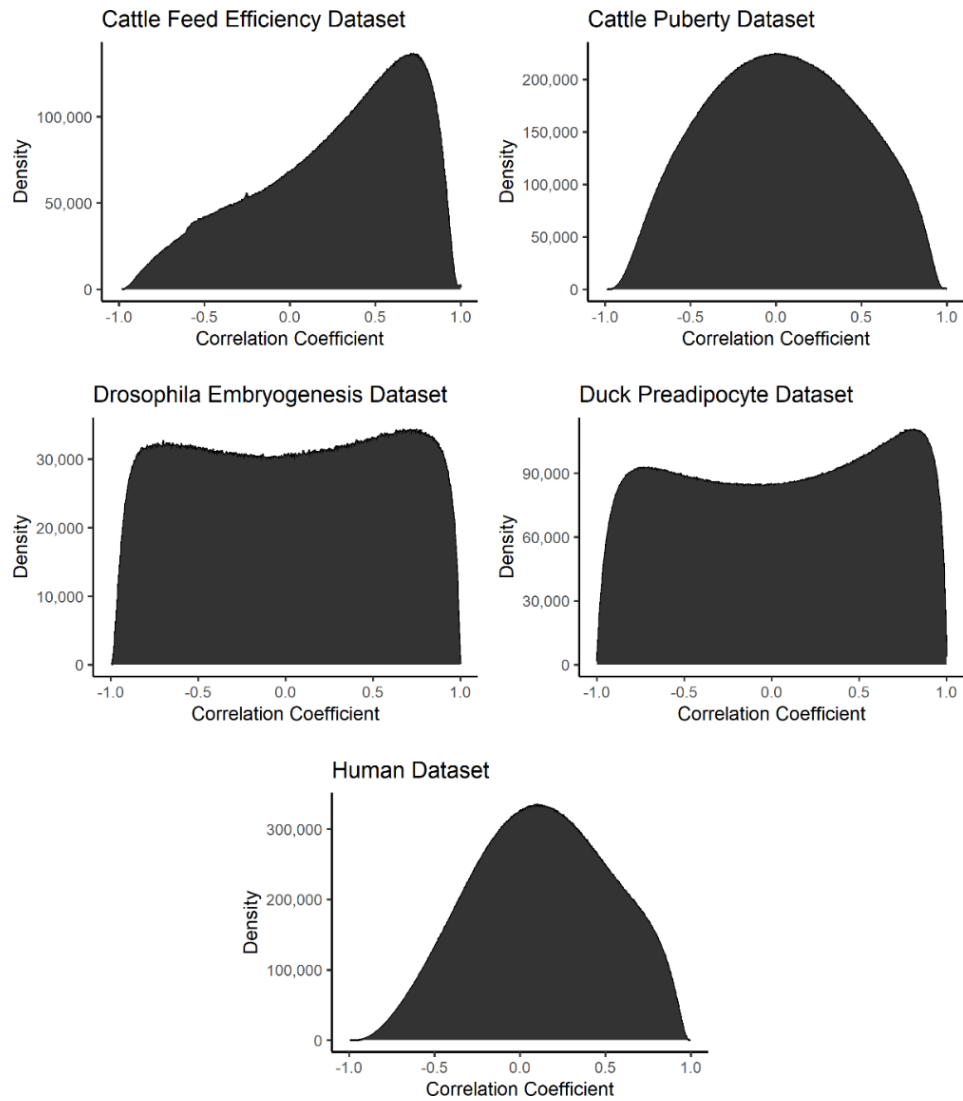

**Figure S1. Frequency distributions of all co-expression correlation coefficients in each of the five RNA-Sequence datasets.** Datasets include: 1) Cattle Feed Efficiency (11,662 genes and 67,995,291 correlations); 2) Cattle Puberty (16,978 genes and 144,117,753 correlations); 3) Drosophila Embryogenesis (7,771 genes and 30,190,335 correlations); 4) Duck Preadipocyte (13,322 genes and 88,731,181 correlations); and 5) Human (19,311 genes and 186,447,705 correlations).



| Cattle Feed Efficiency Dataset |     | Null  |       | Unimodal |     | Symmetric |       |
|--------------------------------|-----|-------|-------|----------|-----|-----------|-------|
|                                |     | Yes   | No    | Yes      | No  | Yes       | No    |
| DE                             | Yes | 157   | 225   | 371      | 11  | 157       | 225   |
|                                | No  | 2,671 | 8,609 | 11,063   | 217 | 2,671     | 8,609 |
| REG                            | Yes | 180   | 892   | 1,046    | 26  | 180       | 892   |
|                                | No  | 2,648 | 7,942 | 10,388   | 202 | 2,648     | 7,942 |

  

| Cattle Puberty Dataset |     | Null  |       | Unimodal |       | Symmetric |       |
|------------------------|-----|-------|-------|----------|-------|-----------|-------|
|                        |     | Yes   | No    | Yes      | No    | Yes       | No    |
| DE                     | Yes | 1,463 | 872   | 1,463    | 872   | 1,463     | 872   |
|                        | No  | 5,855 | 8,788 | 5,859    | 8,784 | 5,855     | 8,788 |
| REG                    | Yes | 567   | 1,017 | 568      | 1,016 | 567       | 1,017 |
|                        | No  | 6,751 | 8,643 | 6,754    | 8,640 | 6,751     | 8,643 |

  

| Drosophyla Embryogenesis Dataset |     | Null  |       | Unimodal |       | Symmetric |       |
|----------------------------------|-----|-------|-------|----------|-------|-----------|-------|
|                                  |     | Yes   | No    | Yes      | No    | Yes       | No    |
| DE                               | Yes | 842   | 2,805 | 842      | 2,805 | 2,881     | 766   |
|                                  | No  | 689   | 3,435 | 699      | 3,425 | 3,040     | 1,084 |
| REG                              | Yes | 111   | 686   | 117      | 680   | 578       | 219   |
|                                  | No  | 1,420 | 5,554 | 1,424    | 5,550 | 5,343     | 1,631 |

  

| Duck Preadipocyte Dataset |     | Null  |        | Unimodal |        | Symmetric |       |
|---------------------------|-----|-------|--------|----------|--------|-----------|-------|
|                           |     | Yes   | No     | Yes      | No     | Yes       | No    |
| DE                        | Yes | 636   | 2685   | 636      | 2685   | 984       | 2686  |
|                           | No  | 1,609 | 8,392  | 1,613    | 8,388  | 2,337     | 7,315 |
| REG                       | Yes | 105   | 570    | 105      | 570    | 183       | 492   |
|                           | No  | 2,140 | 10,507 | 2,144    | 10,503 | 3,487     | 9,160 |

  

| Human Non-diseased Dataset |     | Null  |        | Unimodal |        | Symmetric |        |
|----------------------------|-----|-------|--------|----------|--------|-----------|--------|
|                            |     | Yes   | No     | Yes      | No     | Yes       | No     |
| DE                         | Yes | 503   | 290    | 510      | 283    | 503       | 290    |
|                            | No  | 8,443 | 10,048 | 8,487    | 10,004 | 8,443     | 10,048 |
| REG                        | Yes | 618   | 535    | 621      | 532    | 618       | 535    |
|                            | No  | 8,328 | 9,803  | 8,376    | 9,755  | 8,328     | 9,803  |

**Figure S2. Number of genes assigned to different distribution shapes.** The tables show the number of differentially expressed genes (DE) and regulator (REG) genes assigned to null (Shapes 1 and 2), unimodal (Shapes 1 to 4) and symmetric (Shapes 1, 2, 5 and 6) distributions. Blue cells represent the type of distribution in which DE or REG were found in higher number than expected by chance where variables were found to be dependent ( $P < 0.05$ ).
